# Supplementary material
Source: Elsevier journal article supplement (https://www.sciencedirect.com/science/article/pii/S0033833819300037)
Supplement: mmc1 [file S0033833819300037:mmc1.pdf]

Puntos clave:

- La **patología traumática** del peñasco **puede tener consecuencias graves**, y **en su diagnóstico el radiólogo tiene un papel cardinal**. Es necesario y fundamental sospechar, conocer y buscar posibles lesiones en los pacientes traumatizados.
- La **TC permite detectar afectación a estructuras importantes** con complicaciones devastadoras. El uso de **TC de rutina** de cabeza, cuello y maxilofacial **en la urgencia reconoce** la mayoría de fracturas temporales y sus complicaciones, no siendo necesario por lo tanto una TC específica de peñascos.
- La **identificación de lesiones a estructuras críticas es más importante que clasificar** en categorías generales que carecen de detalle y precisión necesarias para el manejo.
- Es recomendable seguir una **sistemática de búsqueda** en caso de sospecha de traumatismo de hueso temporal para evitar pasar por alto lesiones, así como **conocer bien la anatomía** para no confundir variantes anatómicas y elementos como canalículos óseos con patología.
- Hay signos sugestivos de **lesión no visible** de hueso temporal, que también debemos conocer.
